# Supplementary material
Source: Springer Nature journal article supplement (https://www.springermedizin.de/resource/supplementary/13054_2012_678_MOESM3_ESM.pdf/9708996)

| Study                    | Telemedicine |              | Control    |             | Weight        | Risk Ratio               |
|--------------------------|--------------|--------------|------------|-------------|---------------|--------------------------|
|                          | Events       | Total        | Events     | Total       |               | [95% CI]                 |
| <b>ICU mortality</b>     |              |              |            |             |               |                          |
| Rosenfeld et al., 2000   | 3            | 201          | 29         | 427         | 2.4%          | 0.22 [0.07, 0.71]        |
| Breslow et al., 2004     | 47           | 744          | 120        | 1396        | 12.6%         | 0.73 [0.53, 1.02]        |
| Marcin et al., 2004      | 1            | 47           | 5          | 249         | 0.8%          | 1.06 [0.13, 8.87]        |
| Kohl et al., 2007        | 81           | 2622         | 16         | 189         | 8.2%          | 0.36 [0.22, 0.61]        |
| Vespa et al., 2007       | 70           | 640          | 58         | 578         | 12.5%         | 1.09 [0.78, 1.52]        |
| Thomas et al., 2009      | 165          | 2108         | 188        | 2034        | 16.2%         | 0.85 [0.69, 1.03]        |
| McCambridge et al., 2010 | 110          | 959          | 151        | 954         | 15.3%         | 0.72 [0.58, 0.91]        |
| Morrison et al., 2010    | 208          | 2717         | 91         | 1371        | 15.1%         | 1.15 [0.91, 1.46]        |
| Lilly et al., 2011       | 410          | 4761         | 164        | 1529        | 16.9%         | 0.80 [0.68, 0.95]        |
| <b>Total</b>             | <b>1095</b>  | <b>14799</b> | <b>822</b> | <b>8727</b> | <b>100.0%</b> | <b>0.79 [0.65, 0.96]</b> |

Overall effect:  $p=0.02$ ; heterogeneity:  $I^2=70\%$

| <b>Hospital mortality</b> |             |              |             |              |               |                          |
|---------------------------|-------------|--------------|-------------|--------------|---------------|--------------------------|
| Rosenfeld et al., 2000    | 9           | 201          | 40          | 427          | 2.8%          | 0.48 [0.24, 0.97]        |
| Breslow et al., 2004      | 70          | 744          | 180         | 1396         | 10.4%         | 0.73 [0.56, 0.95]        |
| Kohl et al., 2007         | 157         | 2622         | 21          | 189          | 6.0%          | 0.54 [0.35, 0.83]        |
| Norman et al., 2009       | 120         | 919          | 51          | 356          | 9.1%          | 0.91 [0.67, 1.24]        |
| Thomas et al., 2009       | 209         | 2108         | 245         | 2034         | 13.7%         | 0.82 [0.69, 0.98]        |
| McCambridge et al., 2010  | 141         | 959          | 204         | 954          | 12.9%         | 0.69 [0.57, 0.84]        |
| Morrison et al., 2010     | 288         | 2717         | 136         | 1371         | 13.0%         | 1.07 [0.88, 1.30]        |
| Lilly et al., 2011        | 562         | 4761         | 208         | 1529         | 14.8%         | 0.87 [0.75, 1.01]        |
| Willmitch et al., 2012    | 2212        | 18152        | 798         | 6504         | 17.3%         | 0.99 [0.92, 1.07]        |
| <b>Total</b>              | <b>3768</b> | <b>33183</b> | <b>1883</b> | <b>14760</b> | <b>100.0%</b> | <b>0.83 [0.73, 0.94]</b> |

Overall effect:  $p=0.004$ ; heterogeneity:  $I^2=72\%$

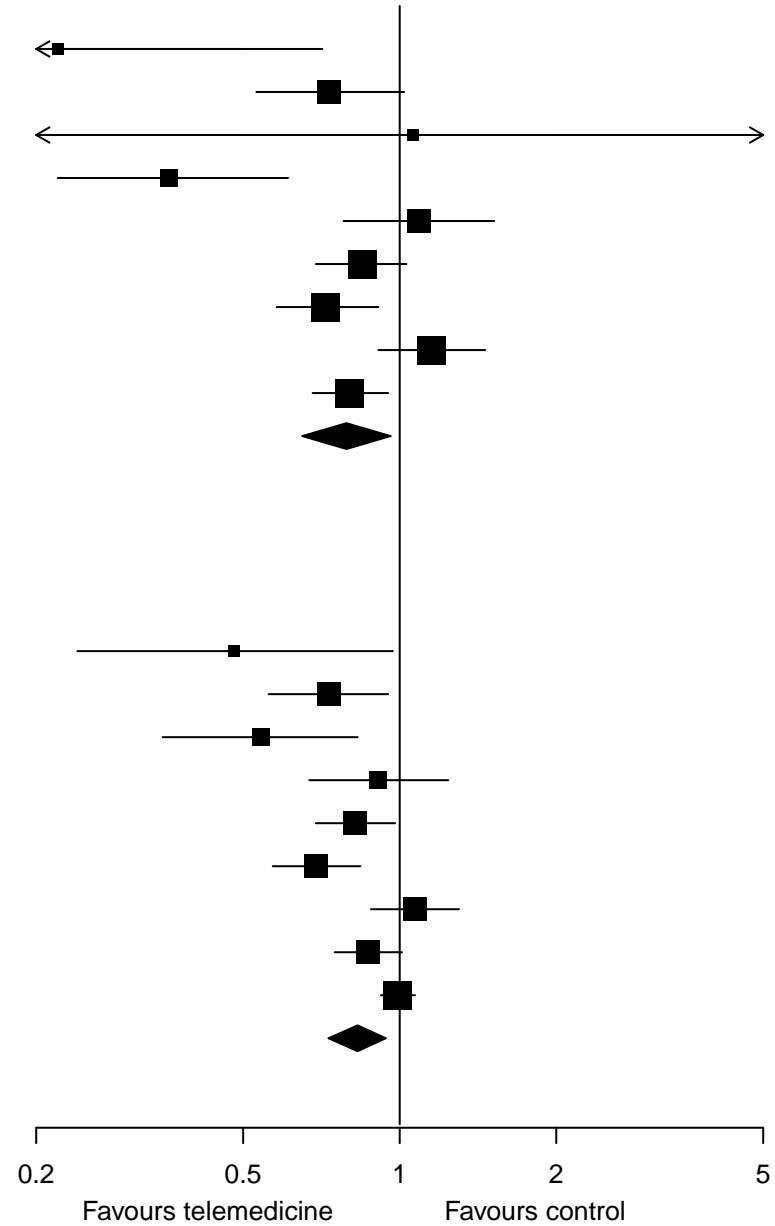

Supplement: MOESM3 [file 9708996]
